# Supplementary material for: Selective detection of methanol vapour from a multicomponent gas mixture using a CNPs/ZnO@ZIF-8 based room temperature solid-state sensor
Source: Royal Society of Chemistry journal article supplement (doi:10.1039/d2ra04665b), 2022-01-01
Supplement: d2ra04665b1.pdf [file d2ra04665b1.pdf]

## Selective detection of methanol vapour from a multicomponent gas mixture using a CNPs/ZnO@ZIF-8 based room temperature solid-state sensor

Lesego Malepe,<sup>a</sup> Derek Tantoh Ndinteh,<sup>a</sup> Patrick Ndungu<sup>\*+b</sup> and Messai Adenew Mamo<sup>\*a</sup>

<sup>a</sup> Department of Chemical Science, University of Johannesburg, PO Box 17011, Doornfontein, 2028 Johannesburg, South Africa

<sup>b</sup> Department of Chemistry, University of Pretoria, Private Bag X20, Hatfield, 0028, Pretoria, South Africa

### Supporting information

(a) Response of sensor B (Sensor-based on only CNPs)

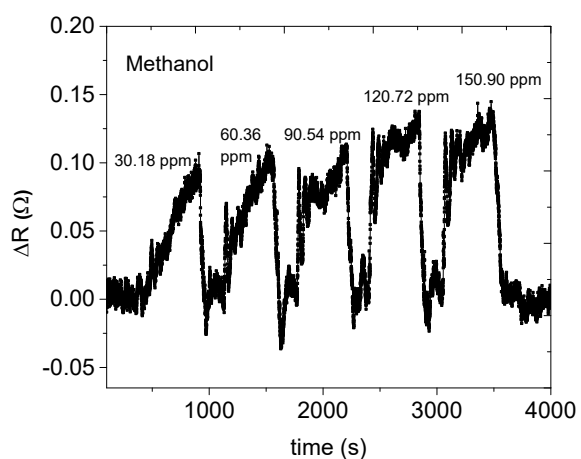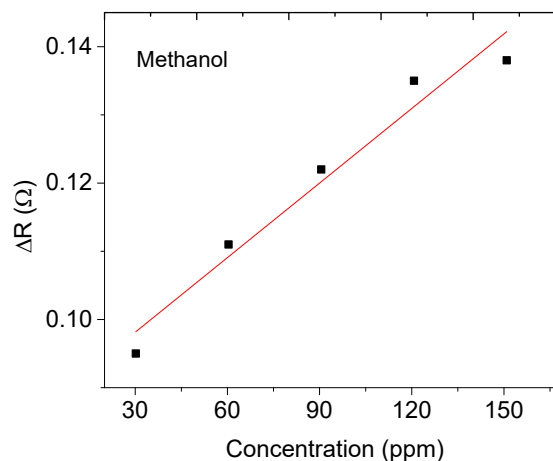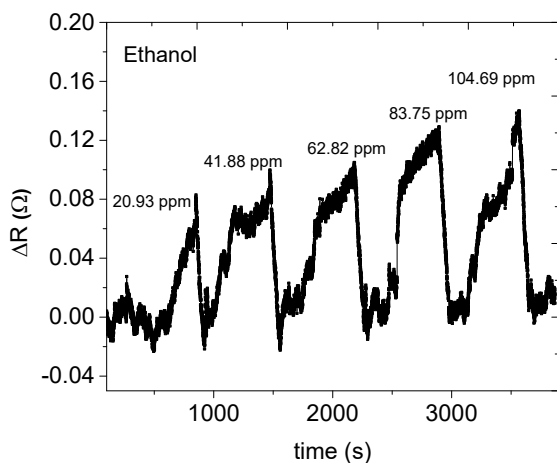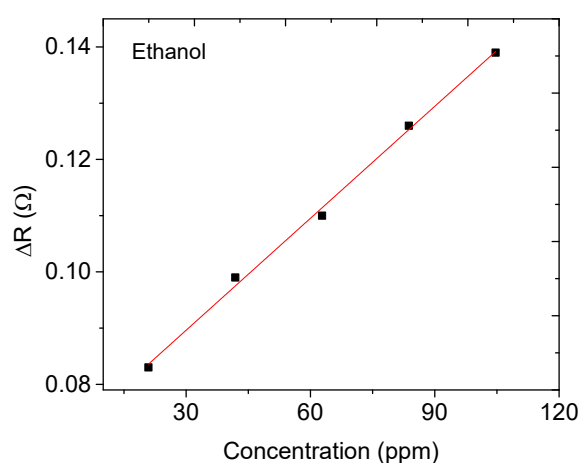

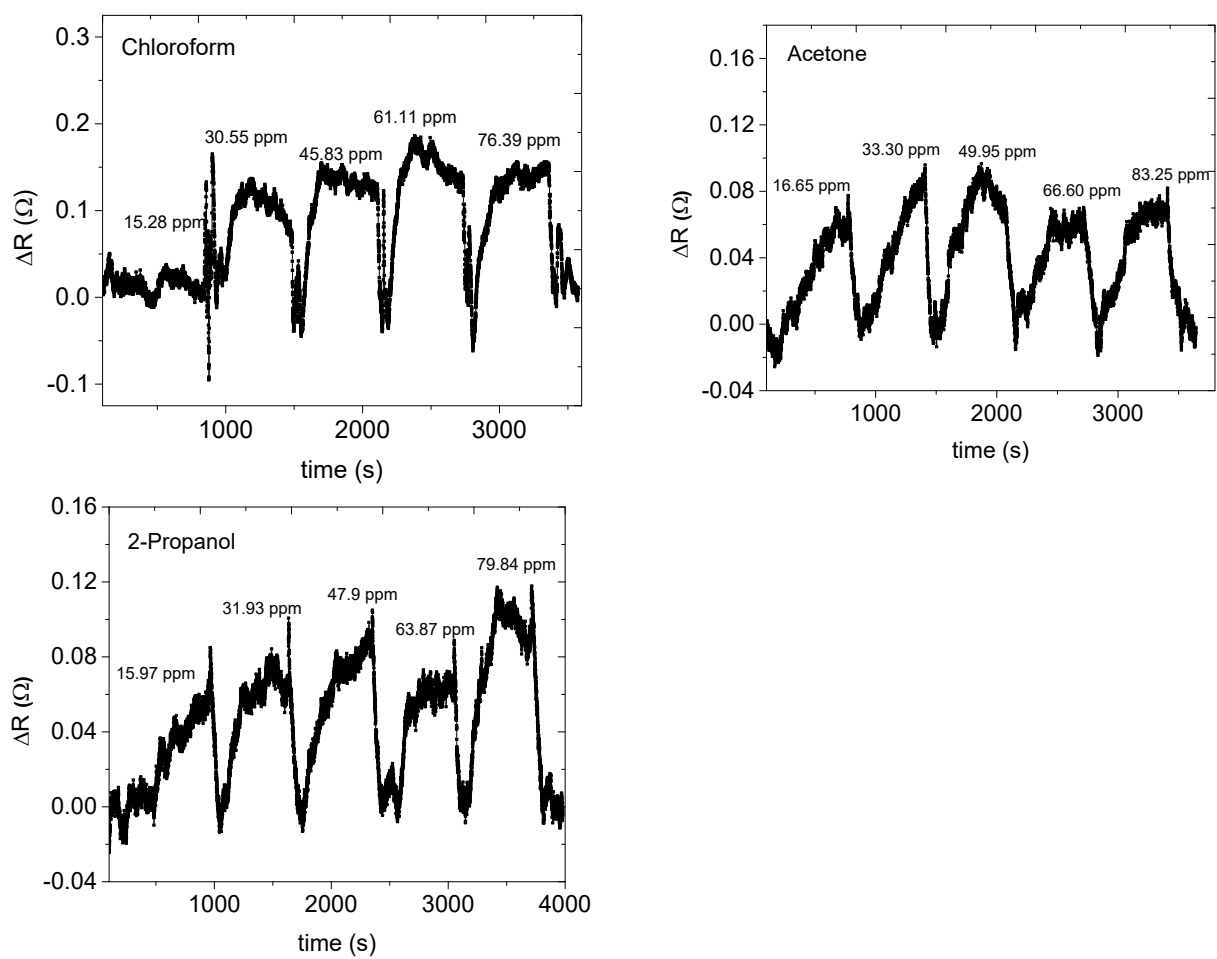

**Fig. S1:** Dynamic response and recovery curve of the sensor based on CNP only (Sensor B).

(b) Sensor C CNPs/ZnO@ZIF-8 (15: 15)mg

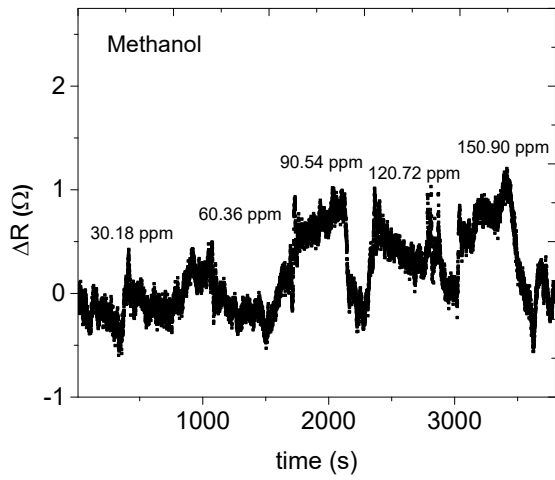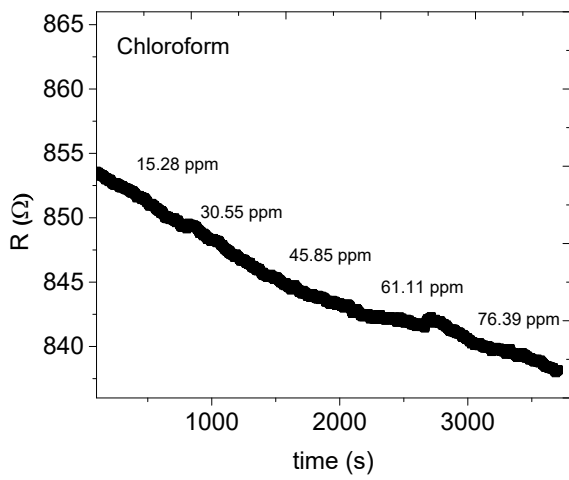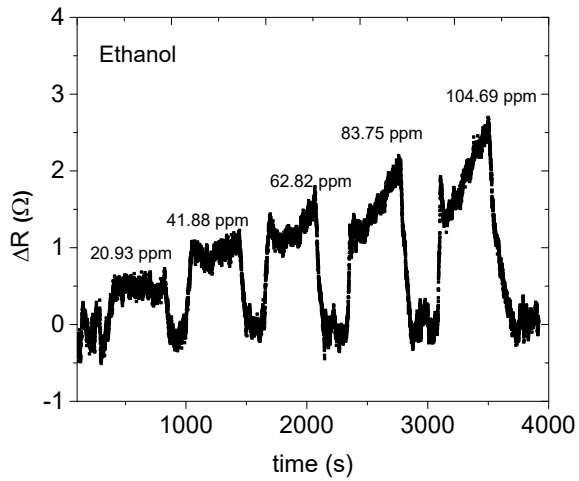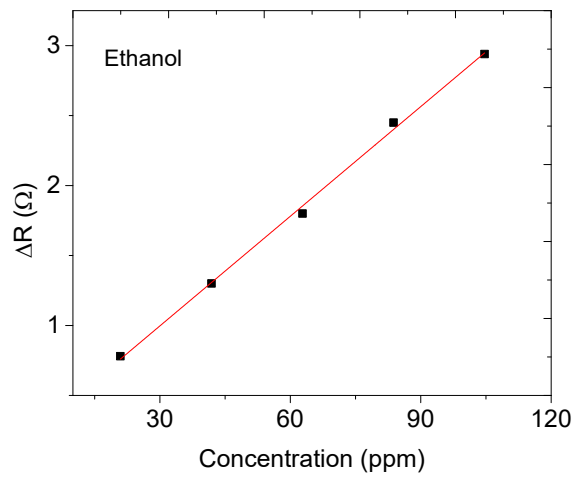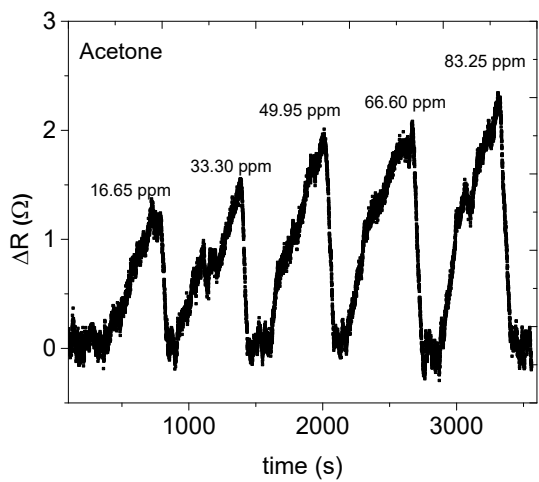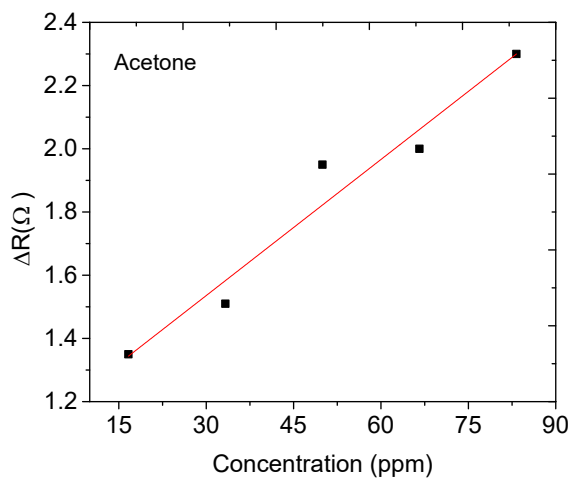

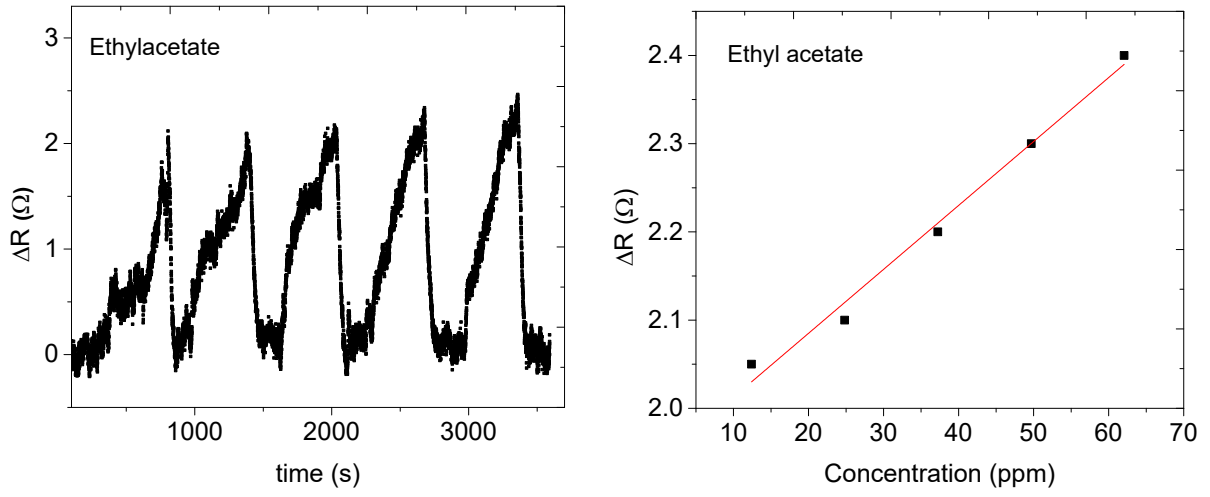

**Fig. S2:** Dynamic response and recovery curve of the sensor based on CNPs/ZnO@ZIF-8 (15:15) mg sensor (sensor C)

(c) Sensor D CNPs/ZnO@ZIF-8 (15:25) mg

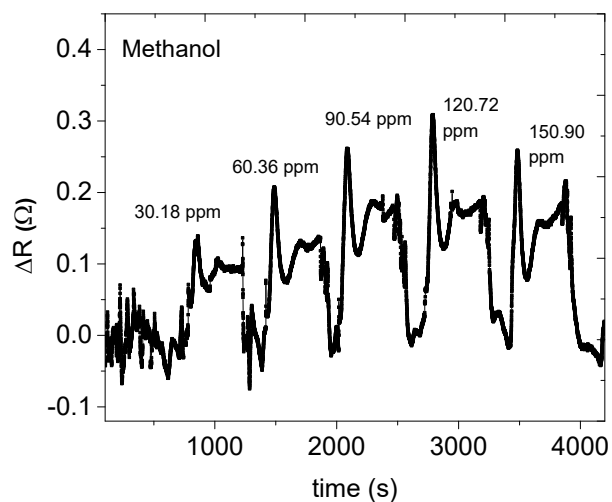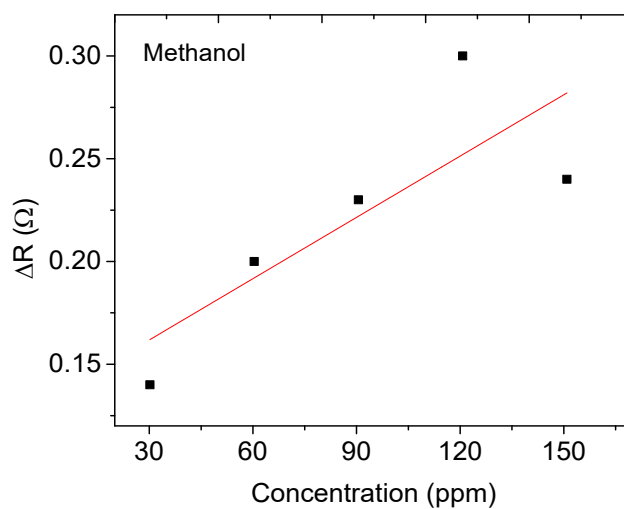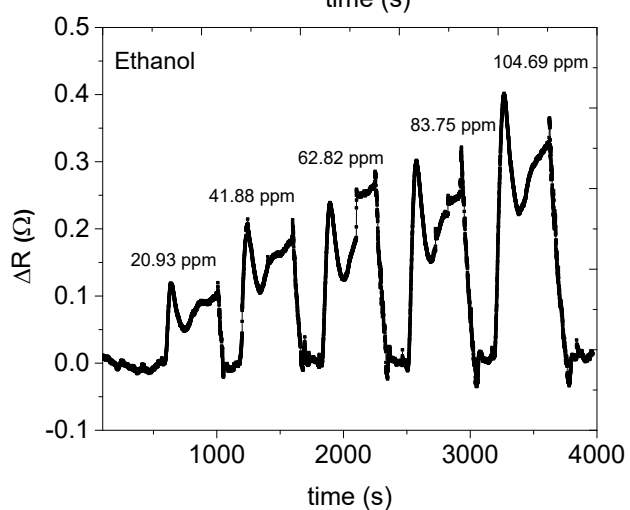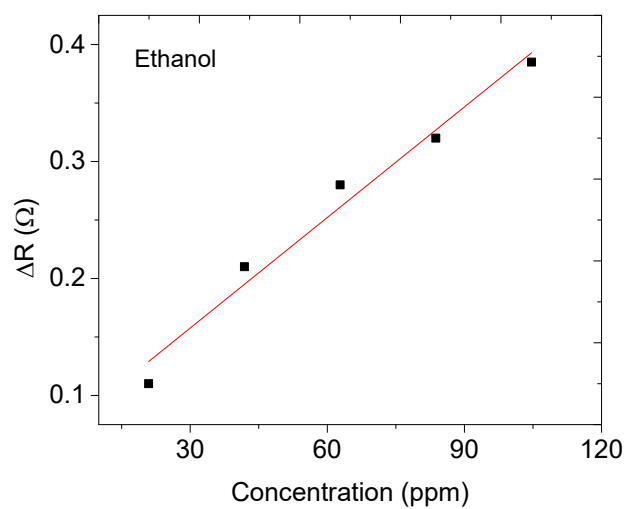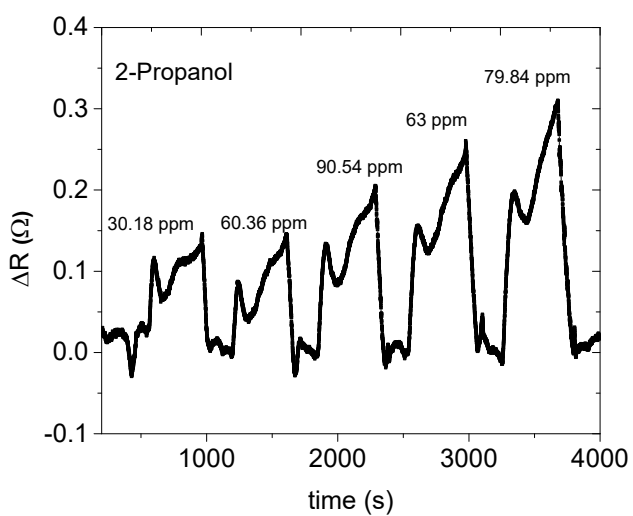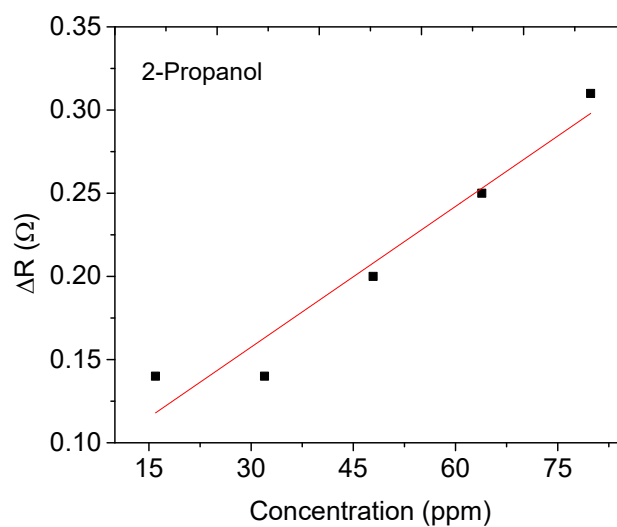

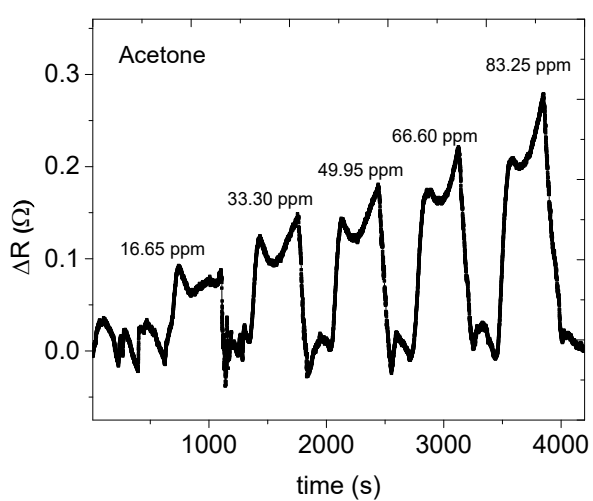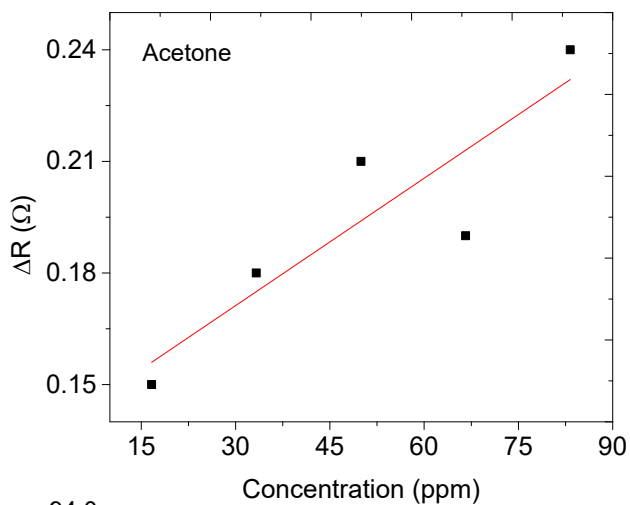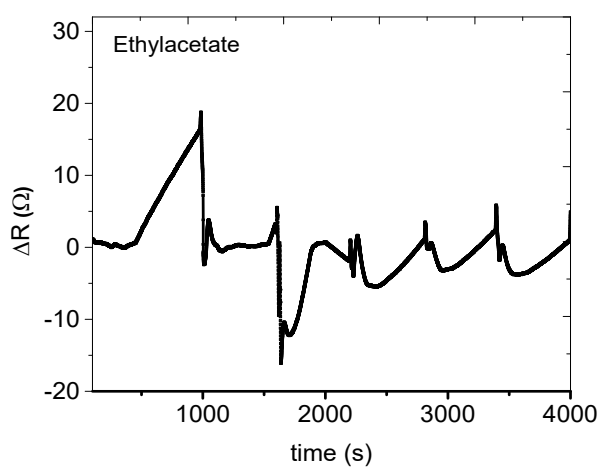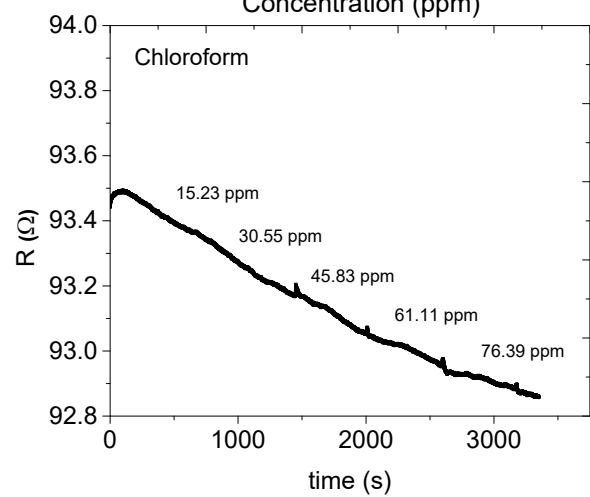

**Fig. S3:** Dynamic response and recovery curve of the sensor based on CNPs/ZnO@ZIF-8 (15:25) mg sensor (sensor D).

(d) Sensor E CNPs/ZnO@ZIF-8 (35:15) mg

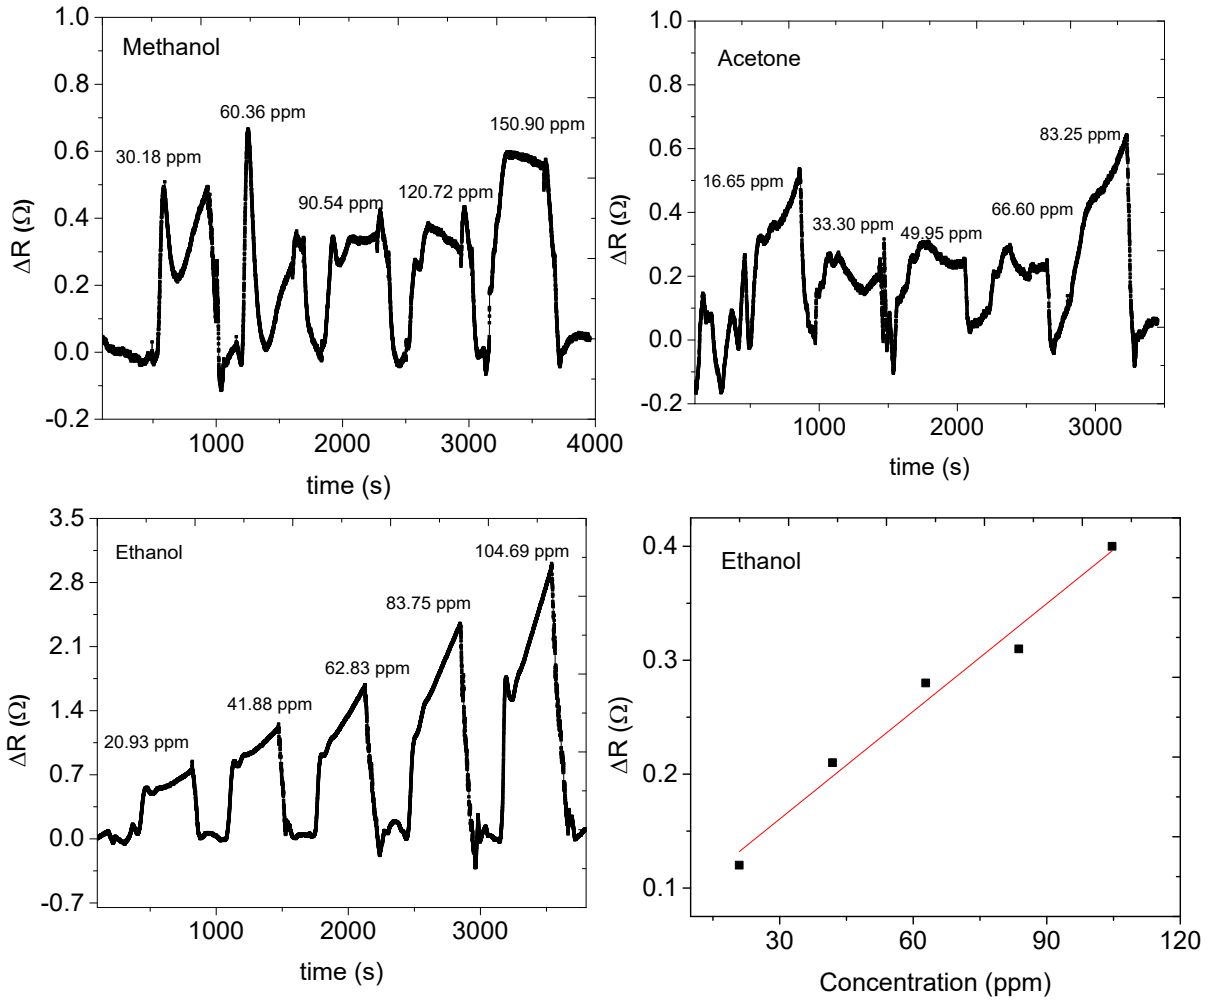

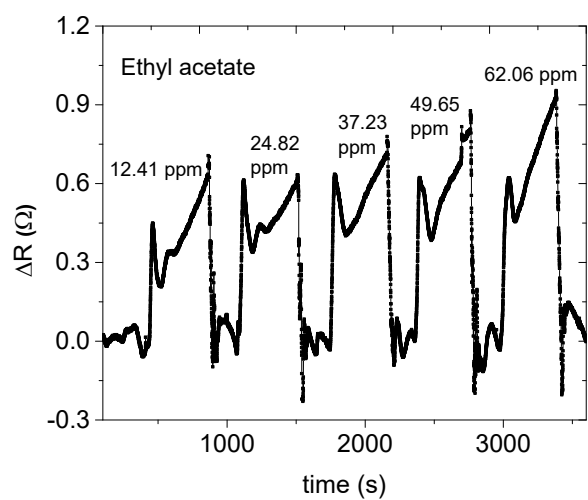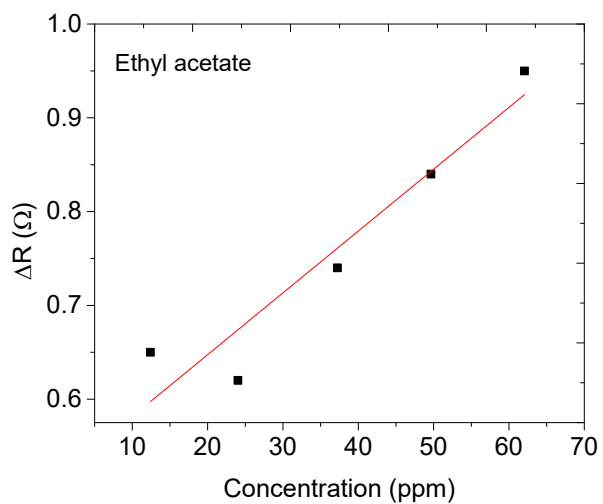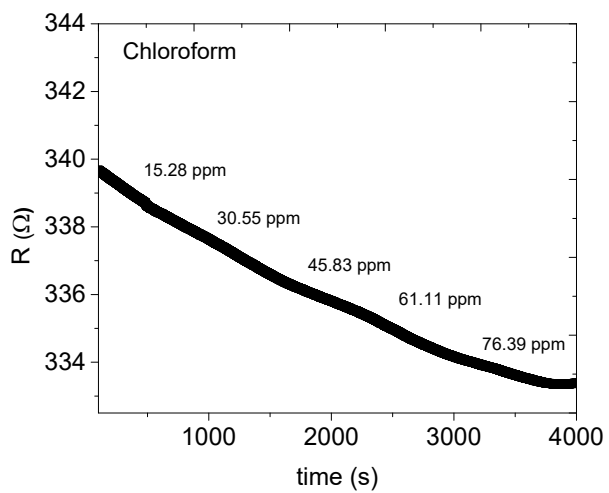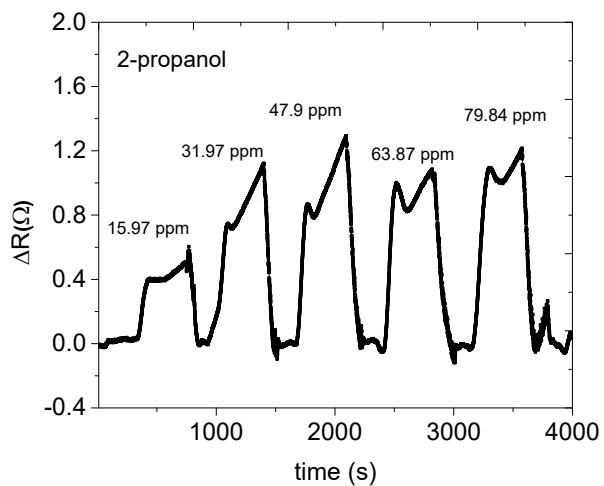

**Fig. S4:** Dynamic response and recovery curve of the sensor based on CNPs/ZnO@ZIF-8 (15:35) mg sensor (sensor E).



(e) Sensor F CNPs/ZnO@ZIF-8 (15:60)mg

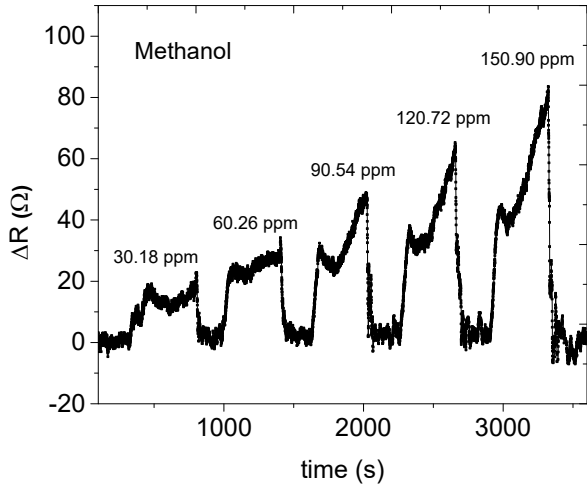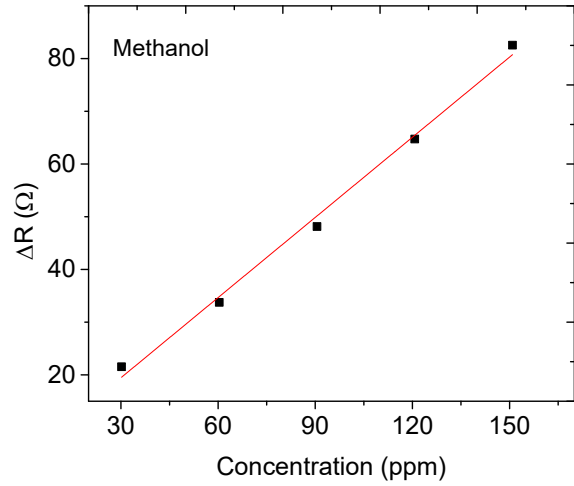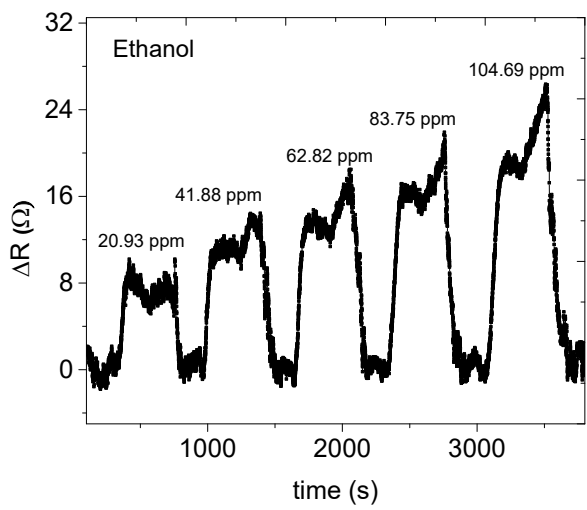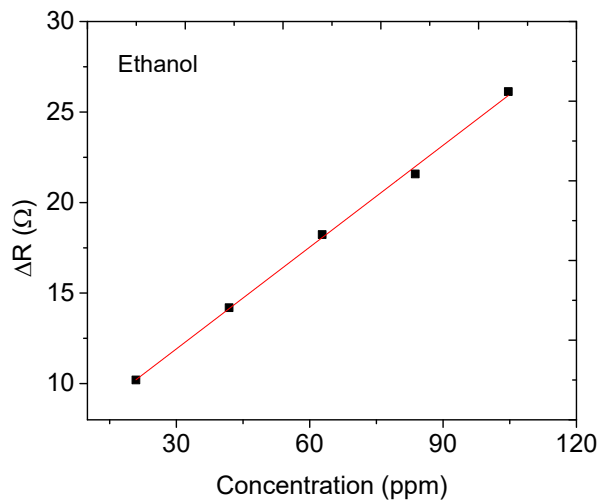

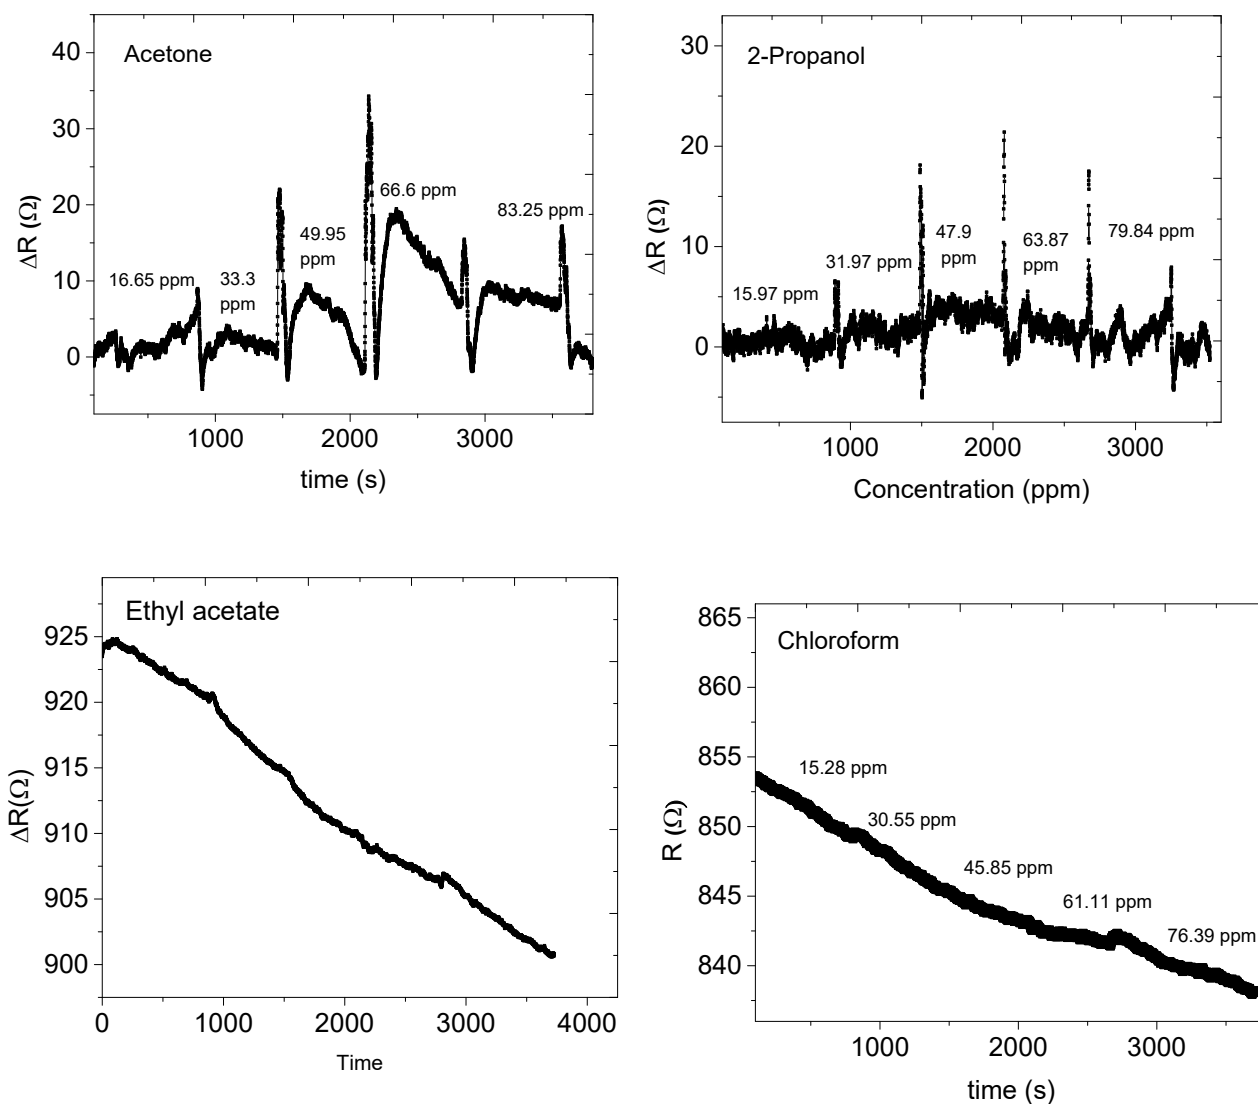

**Fig. S5:** Dynamic response and recovery curve of the sensor based on CNPs/ZnO@ZIF-8 (15:60) mg sensor (sensor F)

(f) the sensor based on ZnO@ZIF-8 towards methanol

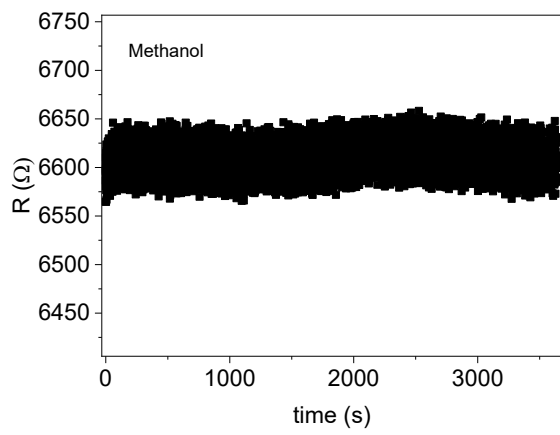

Fig. S6: Dynamic response and recovery curve of the sensor based on ZnO@ZIF-8
